# Supplementary material
Source: HighWire-hosted journal article supplement (https://bmjopen.bmj.com/highwire/filestream/94202/field_highwire_adjunct_files/0/BJSM_Appendix1_76992.pdf)
Supplement: BJSM_Appendix1_76992.pdf [file BJSM_Appendix1_76992.pdf]

**Table S1- Quality assessment tool**

| Item                          | Question                                                                                                                                                                                                                                                                                                                       |
|-------------------------------|--------------------------------------------------------------------------------------------------------------------------------------------------------------------------------------------------------------------------------------------------------------------------------------------------------------------------------|
| Participants/selection bias   | 1- Is the hypothesis/aim/objective of the study clearly described?<br>2- Are the characteristics of the participants included in the study clearly described?<br>3- Is the participants sample representative of child in the population<br>4- Is there information on the possibility of selection bias present in the study? |
| Exposures                     | 5- Are the exposures of interest clearly described?                                                                                                                                                                                                                                                                            |
| Comparison                    | 6- Was a comparison group identified and clearly defined?                                                                                                                                                                                                                                                                      |
| Outcomes                      | 7- Are the main outcomes to be measured clearly described?<br>8- Were the main outcome measures used accurate?                                                                                                                                                                                                                 |
| Findings/statistical analysis | 9- Are the main findings of the study clearly described?<br>10- Were the statistical test used for the main outcomes appropriate?                                                                                                                                                                                              |
| Confounding                   | 11- Are the distributions of main confounders in each group of subjects to be compared clearly described?<br>12- Was there adequate adjustment for confounding in the analyses from which the main findings were drawn?                                                                                                        |
| Losses to follow-up           | 13- Were losses of participants to follow-up reported?<br>14- Is the time period between for the exposure and outcome the same for cases and controls?                                                                                                                                                                         |
| Power                         | 15- Was a sample size calculation reported?<br>16- Did the study have sufficient power to detect important effect where the probability value for a difference being due to chance is less than 5%?                                                                                                                            |
